1 **Assessment of exposure to ionizing radiation in Chernobyl tree**  
2 **frogs (*Hyla orientalis*)**

3

4

5 Pablo Burraco<sup>1,2†</sup>, Clément Car<sup>3†</sup>, Jean-Marc Bonzom<sup>3</sup>, and Germán Orizaola<sup>1,4,5\*</sup>

6

7 <sup>1</sup> Animal Ecology, Department of Ecology and Genetics, Evolutionary Biology Centre,  
8 Uppsala University, 75236 Uppsala, Sweden

9 <sup>2</sup> Institute of Biodiversity, Animal Health and Comparative Medicine, College of Medical,  
10 Veterinary and Life Sciences, University of Glasgow, Glasgow G12 8QQ, UK

11 <sup>3</sup> Research Laboratory on the Effects of Radionuclides on Ecosystems (LECO),  
12 Institute for Radioprotection and Nuclear Safety (IRSN), PSE-ENV/SRTE/LECO, Cadarache,  
13 13115 Saint Paul Lez Durance, France

14 <sup>4</sup> IMIB-Biodiversity Research Institute (Univ. Oviedo-CSIC-Princip. Asturias), University of  
15 Oviedo, 33600 Mieres-Asturias, Spain

16 <sup>5</sup> Zoology Unit, Department of Biology of Organisms and Systems, University of  
17 Oviedo, 33071 Oviedo-Asturias, Spain

18

19 † These authors contributed equality to the study

20

21 \* **Corresponding author:** E-mail: [orizaolagerman@uniovi.es](mailto:orizaolagerman@uniovi.es)

22 **Abstract**

23 Ionizing radiation can damage organic molecules, causing detrimental effects on human and  
24 wildlife health. The accident at the Chernobyl nuclear power plant (1986) represents the  
25 largest release of radioactive material to the environment. An accurate estimation of the  
26 current exposure to radiation in wildlife, often reduced to ambient dose rate assessments, is  
27 crucial to understand the long-term impact of radiation on living organisms. Here, we present  
28 an evaluation of the sources and variation of current exposure to radiation in breeding  
29 Eastern tree frogs (*Hyla orientalis*) males living in the Chernobyl Exclusion Zone. Total dose  
30 rates in *H. orientalis* were highly variable, although generally below widely used thresholds  
31 considered harmful for animal health. Internal exposure was the main source of absorbed  
32 dose rate (81% on average), with  $^{90}\text{Sr}$  being the main contributor (78% of total dose rate, on  
33 average). These results highlight the importance of assessing both internal and external  
34 exposure levels in order to perform a robust evaluation of the exposure to radiation in wildlife.  
35 Further studies incorporating life-history, ecological, and evolutionary traits are needed to  
36 fully evaluate the effects that these exposure levels can have in amphibians and other taxa  
37 inhabiting radio-contaminated environments.

## 38 **Introduction**

39 Living organisms are constantly exposed to ionizing radiation. Cosmic rays, together with  
40 naturally occurring radioactive materials, generate low-level radiation known as background  
41 radiation (Sohrabi, 2013). Ionizing radiation has the capacity to damage organic molecules,  
42 including DNA, either directly by breaking DNA strands or through the generation of free  
43 radicals (Santivasi & Xia 2014). The main concern about the impact of ionizing radiation in  
44 wildlife is not generated by background radiation, but by the release of radioactive material to  
45 the environment due to human actions. These actions include nuclear weapons tests, mining  
46 of radioactive material, and accidents in nuclear facilities. The accidents in the nuclear power  
47 plants of Chernobyl (Ukraine, 1986) and Fukushima (Japan, 2011) represent the largest  
48 releases of ionizing radiation to the environment in human history. In order to reduce human  
49 exposure to radiation after these accidents, human settlement and normal activity were  
50 banned within certain areas, known as *Exclusion Zones*. In the absence of humans, wildlife  
51 becomes key study systems to examine the effects of the long-term exposure to ionizing  
52 radiation. Although the effects on health of the acute exposure to ionizing radiation were  
53 severe right after the Chernobyl accident (e.g. Geras'kin et al. 2008), there is still many  
54 uncertainties about the impact that chronic exposure to lower levels of ionizing radiation can  
55 have on wildlife (e.g. Møller and Mousseau, 2006, 2016; Beresford et al., 2020a,b). An  
56 accurate assessment of the exposure to ionizing radiation is needed to properly evaluate its  
57 consequences on the health of wild populations and across taxa.

58         The International Commission for Radiological Protection (ICRP) determined  
59 reference levels of radiation exposure called Derived Consideration Reference Levels  
60 (DCRLs), defined as a band of dose rate within which there is likely to be some chance of  
61 deleterious effects of ionizing radiation occurring to individuals (ICRP 2008). Different bands  
62 have been determined for a set of Reference Animals and Plants (RAPs; ICRP 2008).  
63 However, RAPs are limited to a few species, and DCRLs are defined mostly based on  
64 theoretical predictions or short-term laboratory procedures, thus they do not include the

65 complexities of ecosystems, where organisms are often exposed to a wide array of  
66 fluctuating conditions and stressors (see e.g. Raines et al. 2020). Since RAPs are just single  
67 species, sometimes purely theoretical, that define entire animal or plant groups (e.g.  
68 “eusocial bee” defining all types of insects; ICRP 2008), they do not include either basic  
69 differences in species life styles, physiology, or morphology. Other thresholds levels have  
70 been proposed for organisms and ecosystems by different organizations (e.g. ERICA,  
71 FASSET, Environment Agency UK, Environment Canada; see summary in Garnier-Laplace  
72 et al. 2008), with standard levels above ICRP values, in most cases. More field studies,  
73 conducted in non-RAP organisms and under ecologically relevant scenarios, are clearly  
74 needed to understand the variability of exposure levels in wildlife.

75 More than three decades have passed since the Chernobyl nuclear power plant  
76 accident, a time that approximately corresponds to the half-life (i.e. the time required for a  
77 50% reduction of the initial levels at the time of the accident) of  $^{90}\text{Sr}$  and  $^{137}\text{Cs}$ , the two main  
78 radioisotopes currently present in the Chernobyl Exclusion Zone (Beresford et al. 2010).  
79 Radiation levels in Chernobyl Exclusion Zone are now several orders of magnitude lower  
80 than at the time of the accident, and they are generated by a different array of radioisotopes  
81 (Beresford & Copplestone 2011). An accurate evaluation of current exposure to ionizing  
82 radiation in wildlife inhabiting the Chernobyl Exclusion Zone needs to consider the  
83 contribution of different radionuclides and radiation types (alpha, beta and gamma), and go  
84 beyond the use of portable dosimeters, which only estimate ambient dose rates, account  
85 only for gamma radiation, and do not distinguish between the contribution of different  
86 radioisotopes (Beresford et al. 2010). A detailed estimation of the current levels of exposure  
87 to ionizing radiation in wildlife living in radio-contaminated areas is crucial to assess the risk  
88 that radioactive substances can represent for these organisms, to provide a proper dosimetry  
89 context for understanding the effects (or lack of effects) of ionizing radiation in ecologically-  
90 realistic scenarios, and to estimate the accuracy of the proposed reference levels used in  
91 radiological assessment.

92           In this study, we examine the most important sources and the variation of the  
93 exposure to current ionizing radiation in breeding Eastern tree frog (*Hyla orientalis*) males  
94 living within the Chernobyl Exclusion Zone. ICRP uses a theoretical frog as a reference for  
95 predicting radiosensitivity in amphibians, for which a band of 40-400  $\mu\text{Gy/h}$  was defined  
96 within is likely to start detecting deleterious effects (ICRP 2008). The ERICA Tool, one of the  
97 most widely used software to assess radiological risk to terrestrial, freshwater and marine  
98 biota, used a default screening dose rate of 10  $\mu\text{Gy/h}$  for protecting organisms living in  
99 natural ecosystems (Brown et al. 2008). We use these references thresholds since they are  
100 widely used by the radioecology community, and are also two of the most conservative ones,  
101 with critical levels normally below other proposed references (Garnier-Laplace et al. 2008).  
102 Previous studies have reported a wide variation in the contribution of internal versus external  
103 exposure in amphibians, as well as differences in radioisotope contributions between species  
104 and areas (e.g. Beresford et al. 2020c). Here, we estimate dose rates in tree frogs collected  
105 during three consecutive breeding seasons (2016-2018) across the wide gradient of  
106 radioactive contamination currently present in the Chernobyl Exclusion Zone. In order to  
107 have a precise estimation of the current exposure to ionizing radiation in wild tree frogs, we  
108 not only quantified ambient dose rates, but also internal and external exposure to radiation in  
109 adult breeding frogs by integrating the activity of both  $^{90}\text{Sr}$  in bones and  $^{137}\text{Cs}$  in muscles. We  
110 expected to find a high contribution of internal dose rates and  $^{90}\text{Sr}$  (Beresford et al. 2020c),  
111 as well as high variability in dose rates across the Chernobyl Exclusion Zone. The  
112 understanding of the variability in radiation exposure in wild amphibians is critical for further  
113 evaluations of potential life-history and eco-evolutionary effects of radiation.

114

## 115 **Results**

### 116 *Ambient dose rates across tree frog's breeding habitats in the Chernobyl Exclusion Zone*

117 Ambient dose rates measured at the twelve *H. orientalis* breeding localities sampled within  
118 the Chernobyl Exclusion Zone ranged from 0.07 to 32.40  $\mu\text{Sv/h}$  (Table 1). Six localities had

119 ambient dose rates above 1  $\mu\text{Sv/h}$  and are located in areas commonly considered as highly  
120 contaminated ( $> 1000 \text{ kBq/m}^2$  of  $^{137}\text{Cs}$  in 2018; Fig. 1). Six additional localities had ambient  
121 dose rates below 0.3  $\mu\text{Sv/h}$  ( $< 375 \text{ kBq/m}^2$  of  $^{137}\text{Cs}$  in 2018; Fig. 1).

122

### 123 *Radioactivity concentration in tree frog's bones and muscles*

124 Among the 226 male Eastern tree frogs (*Hyla orientalis*) examined, 65 individuals had activity  
125 concentrations below detection levels for  $^{90}\text{Sr}$  (29%), and 35 individuals for  $^{137}\text{Cs}$  (15%). In  
126 individuals where activity concentrations were above detection levels,  $^{90}\text{Sr}$  activity in bones  
127 ranged from 0.10 to 1156.98 Bq/g (fresh weight), which represents 0.0001 to 115.69 Bq/g  
128 of whole-body concentration (Supplementary data). Activity concentrations for  $^{137}\text{Cs}$ ,  
129 measured in muscle tissue, ranged from 0.01 to 56.86 Bq/g (fresh weight), representing  
130 0.0077 to 39.23 Bq/g of whole-body concentration (Supplementary data). The contribution of  
131  $^{90}\text{Sr}$  to the total activity concentration of frogs living in localities with ambient dose rate  $> 1$   
132  $\mu\text{Sv/h}$  was, overall, two-fold higher than that of  $^{137}\text{Cs}$  (66%  $^{90}\text{Sr}$  contribution *versus* 33% of  
133  $^{137}\text{Cs}$  contribution, on average).

134

### 135 *Dose rates of H. orientalis within Chernobyl Exclusion Zone*

136 Total dose rates of *H. orientalis* males ranged between 0.01 and 39.35  $\mu\text{Gy/h}$  among  
137 individuals with activity rates above detection levels (Table 2, Fig. 2). Total dose rates varied  
138 substantially within and among localities, locality averages ranging from ca. 0 to 20  $\mu\text{Gy/h}$   
139 (Table 2, Fig. 2). All sampled individuals had total dose rates below ICRP's 40  $\mu\text{Gy/h}$  level  
140 for the reference frog (ICRP 2008), whereas ca. 20% ( $n = 46$ ) had rates above ERICA's 10  
141  $\mu\text{Gy/h}$  screening dose rate limit for protecting ecosystems (Brown et al. 2008; Fig. 2). Internal  
142 dose rates ranged between 0.01 and 37.49  $\mu\text{Gy/h}$ , whereas external dose rates ranged  
143 between ca. 0 and 2.0  $\mu\text{Gy/h}$  (Table 2; Fig. S1). Internal and external dose rates were highly,  
144 and positively correlated (conditional  $R^2 = 0.93$ ; Fig. S1). For individuals living in areas where  
145 ambient dose rate was  $> 1 \mu\text{Sv/h}$  (i.e. with individual dose rates above minimal detectable

146 activities, see Methods), the contribution of internal dose rate to the total individual dose rate  
147 was always higher than the contribution of the external dose rate (83% of contribution of the  
148 internal dose rate, on average;  $\chi^2_{(1,147)} = 14.41$ ,  $p < 0.001$ ; Fig. 3). There was a highly  
149 significant and positive correlation between ambient dose rate and total individual dose rate  
150 ( $\chi^2_{(1,226)} = 15.21$ ,  $p < 0.001$ , Estimate = 0.187; conditional  $R^2 = 0.95$ ; Fig. 4). The contribution  
151 of  $^{90}\text{Sr}$  represented, on average, 78% of the total dose rate of frogs living in localities with  
152 ambient dose rate  $> 1 \mu\text{Sv/h}$  (Fig. 5), with a contribution of  $^{90}\text{Sr}$  to the internal dose rate six-  
153 fold higher than that of  $^{137}\text{Cs}$  (86%  $^{90}\text{Sr}$  contribution *versus* 14% of  $^{137}\text{Cs}$  contribution, on  
154 average, Fig. S2), despite only a 35% contribution of  $^{90}\text{Sr}$  to the external dose rate (Fig. S3,  
155 Supplementary data).

156

## 157 Discussion

158 Our study shows that radiation exposure, in breeding males of the Eastern tree frog (*Hyla*  
159 *orientalis*) inhabiting across a wide gradient of radioactive contamination in the Chernobyl  
160 Exclusion Zone, is highly variable and, overall, below international thresholds for detecting  
161 damage. Individual dose rates varied substantially both at the inter- and intra-locality level.  
162 Total dose rates in Chernobyl tree frogs during the breeding season are dominated by  
163 internal, rather than external radiation levels, and are primarily a consequence of the doses  
164 of  $^{90}\text{Sr}$  in bones. Finally, although total individual dose rates were positively correlated with  
165 ambient dose rates, our data indicate that using only ambient dose rates will result in a poor  
166 estimation of the exposure to radiation in our study species as this parameter does not reflect  
167 the inter-individual variation in absorbed radiation.

168 Despite our study comprehensively sampled frogs within twelve different localities and  
169 across the gradient of radioactive contamination in Chernobyl Exclusion Zone (Fig. 1), all the  
170 individuals presented total dose rates below the ICRP threshold level of  $40 \mu\text{Gy/h}$  (and also  
171 below other standards set by multiple organizations, see ICRP 2008, Garnier-Laplace et al.  
172 2008). When using the more conservative  $10 \mu\text{Gy/h}$  screening level suggested by ERICA for

173 protecting ecosystems (Brown et al. 2008), about 20% of the sampled *H. orientalis* were  
174 above this level, corresponding mainly to frogs collected in the two most radio-contaminated  
175 localities (AZ and VE, Fig. 2). Overall, these results suggest that three decades after the  
176 nuclear accident, exposure to radiation within the Chernobyl Exclusion Zone has dropped, in  
177 most cases, down below levels supposed to be damaging for these frogs during the breeding  
178 season (see Garnier-Laplace et al. 2008). Therefore, as a general prediction, negative  
179 effects of radiation are unlikely to be detected, except perhaps in the most radio-  
180 contaminated localities within Chernobyl (e.g. AZ and VE in our study, but see below).  
181 Anyway, these values need to be interpreted regarding the ecological characteristics that  
182 underlie our sampling design, as dose rates were measured on breeding individuals that  
183 expend a large amount of time in the interface between water/shoreline. A higher exposure is  
184 likely expected for frogs buried in the ground or leaf litter during the hibernation period, and  
185 therefore the within-year and lifetime variation in radiation levels deserves further exploration.

186 In our study, we examined  $^{90}\text{Sr}$  and  $^{137}\text{Cs}$  levels as sources of radiation for estimating  
187 internal and external dose rates. At present,  $^{90}\text{Sr}$  and  $^{137}\text{Cs}$  are the most abundant  
188 radioisotopes in the Chernobyl Exclusion Zone, whereas several radioisotopes with short  
189 half-life have already disappeared (e.g.  $^{131}\text{I}$ ,  $^{132}\text{Te}$ ,  $^{140}\text{Ba}$ ; Beresford et al., 2010). However,  
190 other less abundant radionuclides such as  $^{241}\text{Am}$ ,  $^{238}\text{Pu}$ , and  $^{239}\text{Pu}$ , are still present in the  
191 area and they might contribute to a fraction of the total dose rate accumulated by an  
192 organism (Beresford et al., 2020c). Nonetheless, previous studies conducted in the  
193 Chernobyl Exclusion Zone have reported a minimal contribution of these low-abundant  
194 isotopes to total dose rates in amphibians (Beresford et al., 2020c). Therefore, although  
195 our approach can slightly underestimate total dose rates in breeding tree frogs, we can  
196 consider that these differences should be minimal, and our dose rate estimates accurate.

197 Thresholds that determine radiation levels likely to cause damage are set without  
198 tests in ecological settings and can be inaccurate (see discussion in e.g. Raines et al. 2020).  
199 In our study system, further studies will determine whether current radiation levels



200 experienced by Chernobyl tree frogs can negatively impact their life-history and eco-  
201 evolutionary dynamics (see e.g. Burraco et al. 2021). On this respect, there are important  
202 aspects that deserve further research. For example, we need to understand if adults of *H.*  
203 *orientalis* can have a higher sensitivity to radiation than the one predicted for the reference  
204 frog used by ICRP (ICRP 2008), as a consequence of differences in shape, size or life  
205 history between tree frogs, and the parameters considered when defining the ICRP  
206 theoretical reference frog. As commented above, dose rate can also vary across seasons  
207 and during the life-time of an individual. Furthermore, other ecological stressors such as  
208 diseases, parasites, or droughts, combined with small but still relevant effects of ionizing  
209 radiation can contribute to generate imbalances in the physiology and life-history of tree frogs  
210 at radiation levels defined as safe (Beresford et al. 2020a). Finally, effects of radiation  
211 currently observed can be a consequence of the impact of historical exposure to radiation,  
212 i.e. exposure to much higher radiation levels immediately after the accident (Beresford et al.  
213 2020a). Therefore, differences across the radiation gradient within the Chernobyl area, but  
214 also between contaminated and non-contaminated localities outside the Exclusion Zone,  
215 may be linked to transgenerational carry-over effects induced by radiation in the past  
216 (transferred either by genetic and/or epigenetic mechanisms, Beresford et al. 2020a).  
217 Evaluating the relevance of these and other possible scenarios will improve our  
218 understanding on the effects that past and current exposure to ionizing radiation can have on  
219 wildlife health.

220 Our results also reveal that radioecology studies using only ambient radiation levels  
221 will inaccurately estimate the exposure of organisms to radiation (see e.g. comments in  
222 Beresford & Copplestone 2011, Beresford et al. 2012). We found a positive correlation  
223 between ambient dose rate and total individual dose rates in *H. orientalis*, suggesting that  
224 ambient radiation can be used to broadly define contamination areas for the species in  
225 Chernobyl. However, the high variation in individual total dose rates observed within each  
226 locality (i.e. for which ambient radiation is considered as a single value) indicates that using

227 only ambient dose rates may lead to non-accurate estimates of the exposure to radiation  
228 experienced by each individual. Furthermore, previous studies on amphibians have revealed  
229 a large inter-specific variation in the contributions of internal and external dose rates. For  
230 example, internal dose rate represented ca. 40% of the total dose rate in moor frogs (*Rana*  
231 *arvalis*), ca. 50% in fire-bellied toads (*Bombina bombina*), and more than 70% in spadefoot  
232 toads (*Pelobates fuscus*), collected in the red forest area of Chernobyl Exclusion Zone  
233 (Beresford et al. 2020c). In other areas, internal dose rate was reported to have a minimal  
234 contribution to the total dose rate of moor frogs (*Rana arvalis*), collected in ponds of central  
235 Sweden within areas contaminated from the Chernobyl fallout (Stark et al. 2004). For other  
236 animal taxa, the contribution of internal dose rates can be as low as ca. 10% in bumblebees  
237 or ca. 20% in voles (*Microtus* spp.; Beresford et al. 2020c). Our study reports some of the  
238 largest contributions of internal dose rates reported for wildlife (83% internal contribution to  
239 total dose rate, Beresford et al. 2020c), and agrees with previous results in a similar species,  
240 the Japanese tree frog (*Hyla japonica*), examined in Fukushima and with internal dose rates  
241 contributing between 92-69% to the total dose rate (Giraudeau et al. 2018). Levels of <sup>90</sup>Sr  
242 accumulated in the bones of *H. orientalis* contributed to most of the total individual dose rate  
243 (78%, on average), mostly due to its contribution to internal dose rate (86% on average, for  
244 frogs living in localities with ambient dose rate > 1 μSv/h). This also agrees with previous  
245 studies in Chernobyl reporting that <sup>90</sup>Sr contributed between ca. 90% of the total dose rate in  
246 common toads (*Bufo bufo*) and spadefoot toads (*Pelobates fuscus*), and to a bit less than  
247 60% in fire-bellied toads (*Bombina bombina*; Beresford et al. 2020c). Overall, <sup>90</sup>Sr is the main  
248 source of total dose rates among Chernobyl wildlife (Beresford et al 2020c). Our results  
249 confirm the need to conduct detailed evaluations of internal exposure (i.e. internal dose  
250 rates) in order to precisely determine exposure levels in wildlife (Beaugelin-Seiller et al.  
251 2003, Beresford et al 2020a,c).

252 Overall, this study presents a detailed evaluation of the variability of current exposure  
253 to radiation in breeding Eastern tree frogs (*H. orientalis*) living within the Chernobyl Exclusion

254 Zone. Our study reveals the need to estimate total individual dose rates (i.e. including both  
255 internal and external exposure), and to evaluate the most common radioisotopes in order to  
256 accurately assess wildlife exposure to radiation. Dose rates, in our study species, are below  
257 widely used ICRP bands and most other proposed thresholds (ICRP 2008; Garnier-Laplace  
258 et al. 2008), whereas only 20% of the quantified dose rates were above ERICA screening  
259 levels for protecting ecosystems (Brown et al. 2008). However, many uncertainties remain  
260 around the estimation of these thresholds (e.g. Garnier-Laplace et al. 2008, Raines et al  
261 2020), and therefore detailed studies incorporating life-history and eco-evolutionary variability  
262 are needed in order to properly evaluate the status of this species and other wildlife  
263 inhabiting Chernobyl.

264

## 265 **Methods**

### 266 *Field sampling and laboratory procedures with *Hyla orientalis**

267 We used the Eastern tree frog (*Hyla orientalis*) as our study species. *Hyla orientalis* is a  
268 cryptic species of the European tree frog (*Hyla arborea*) group, distributed from the Caspian  
269 Sea to the Baltic Sea (Stök et al. 2012). Females start to breed at 2-3 years of age (Özdemir  
270 et al. 2012), which means that 10-15 generations have pass since the Chernobyl accident  
271 (1986). The species requires warm temperature for the start of the breeding season, which  
272 normally occurs in May-June in the study area. *H. orientalis* hibernates buried in the soil or  
273 under rocks, leaf litter or wood. Adults feed on a large diversity of small arthropods.

274 During three consecutive years (2016-2018), we collected adult males of *H. orientalis*  
275 actively calling during the breeding season in ponds located within the Chernobyl Exclusion  
276 Zone (Ukraine, Figure 1). In total, we examined 226 *H. orientalis* males from twelve localities  
277 within the Chernobyl Exclusion Zone (Table 1; Figure 1). Frogs were captured during the  
278 night (from 10pm to 1am), placed in plastic bags and transported to our field laboratory in  
279 Chernobyl. On the next morning, we recorded different morphological traits of each frog  
280 (snout-to-vent length, body depth and width) using a calliper to the nearest 1 mm, and we

281 weighted each individual using a precision balance to the nearest 0.01 g. Morphometric  
282 measurements were used to define individual shapes in order to estimate individual dose  
283 rates (see below). Once morphometric measurements were recorded, we euthanized frogs  
284 by pithing without decapitation (AVMA, 2020), and tissue and bone samples were stored for  
285 radiological evaluation. All animals were collected, and procedures conducted, under permit  
286 of Ministry of Ecology and Natural Resources of Ukraine (No. 517, 21.04.2016).

287

#### 288 *Field estimation of radiation levels*

289 At each locality, we estimated ambient dose rate using a radiometer MKS-AT6130 to  
290 measure both gamma dose rate ( $\mu\text{Sv/h}$ ) and the flux of beta particles ( $\text{counts cm}^{-2} \text{min}^{-1}$ )  
291 at ca. 5 cm above the surface of water (0.3-1.0 m depth) in five random points along the  
292 shoreline and in surrounding terrestrial environment. In most cases, the shoreline values  
293 had lower variability, while the terrestrial and air (i.e. above water level) values varied  
294 substantially. We assume that shoreline values are more indicative of the environment  
295 used by frogs during the breeding season, and therefore we used those values for dose  
296 assessment (Table 1).

297

#### 298 *External exposure: deposits of $^{90}\text{Sr}$ and $^{137}\text{Cs}$ in the soil of the study localities*

299 In order to estimate radioactive levels of the study localities, and its contribution to  
300 external dose rates, we used a spatial database derived from the integration of the  
301 airborne gamma survey and the results of soil sampling in earlier 1990s (Arkhipov et al.,  
302 1995). The final database represents a geo-positioned 100 × 100 m grid with values of  
303 total  $^{90}\text{Sr}$  and  $^{137}\text{Cs}$  deposits fell out after the Chernobyl accident. To estimate  $^{90}\text{Sr}$  and  
304  $^{137}\text{Cs}$  activity for the sampling localities, we estimated the geometric mean ( $n= 50$  points)  
305 from these integrated databases over a 400 meters radius area centred on the study  
306 pond, and activity estimates were decay-corrected to the time of the current study (spring  
307 2016-2018; Figure 1). A similar approach, and spatial database, has been previously used

308 in studies of other animals with relatively large home ranges, when direct evaluation of soil  
309 sampling was unfeasible (amphibians, Gashchak et al., 2009a; birds, Gaschak et al.,  
310 2009b; rodents, Maklyuk et al., 2007; bats Gashchak et al., 2010).

311

312 *Internal exposure: estimation of  $^{90}\text{Sr}$  activity concentration in bones*

313 Relatively high  $^{90}\text{Sr}$  activity concentration is found in the bones of animals living in the  
314 Chernobyl Exclusion Zone (e.g. Maklyuk et al., 2007; Gaschack et al., 2009b, 2010),  
315 which allows the application of standard beta spectrometry methods (Bondarkov et al.,  
316 2002). In our study, we sampled a femur bone of every frog that was thoroughly cleaned  
317 up from remains of soft tissues. Then, we dried the bone sample in order to estimate dry  
318 mass to the nearest 0.01 g. After this, we diluted the sample with concentrated  $\text{HNO}_3$  and  
319  $\text{H}_2\text{O}_2$ . We evaporated the obtained solution to generate wet salts, followed by the addition  
320 of 1M  $\text{HNO}_3$  to standardize the geometry. We used the final solution for beta-  
321 spectrometry, and recalculated the obtained data to the dry mass values of each sample.  
322 We used a  $\beta$ -spectrometer EXPRESS-01 with a thin-filmed (0.1 mm) plastic scintillator  
323 detector, with the software “Beta+” (developed by the Institute of Nuclear Research at the  
324 National Academy of Science of Ukraine). This method allows to measure  $^{90}\text{Sr}$  content in  
325 thick-layered samples with a comparable  $^{137}\text{Cs}$  content ( $^{137}\text{Cs}/^{90}\text{Sr}$  ratio not exceeding  
326 30:1; Bondarkov et al., 2002). We processed the obtained experimental spectrum using  
327 correlations with the measured spectra from OISN-3 standard mixing sources (Applied  
328 Ecology Laboratory of Environmental Safety Centre, Odessa, Ukraine; e.g.  $^{90}\text{Sr}+^{90}\text{Y}$ ,  $^{137}\text{Cs}$   
329 and the  $^{90}\text{Sr} + ^{90}\text{Y}$ , and  $^{137}\text{Cs}$  combinations), as well as from background. The minimal  
330 detectable activity (MDA) was 0.6 Bq per sample. The small mass of the bone samples  
331 and the relatively low contamination of frogs from some localities did not allow to estimate  
332  $^{90}\text{Sr}$  activity concentration above MDA (Supplementary data).

333

334 *Internal exposure: estimation of  $^{137}\text{Cs}$  activity concentration in muscles*

335 In order to estimate  $^{137}\text{Cs}$  levels, we sampled muscle tissue from frog legs. We measured  
336 the wet mass of the muscle sample to the nearest 0.01 g. Then, we diluted the muscle  
337 sample with concentrated  $\text{HNO}_3$  and  $\text{H}_2\text{O}_2$ . The obtained solution was evaporated to  
338 generate wet salts, followed by the addition of 1M  $\text{HNO}_3$  to standardize the geometry. We  
339 used the final solution for gamma-spectrometry, and recalculated the obtained data to the  
340 wet mass values of each sample. We measured  $^{137}\text{Cs}$  activity concentrations on the  
341 muscle samples using a Canberra-Packard gamma-spectrometer with a high-purity  
342 germanium (HPGe) detector (GC 3019). A OISN-1 standard mixed source  
343 ( $^{44}\text{Ti}/^{137}\text{Cs}/^{152}\text{Eu}$ ; Applied Ecology Laboratory of Environmental Safety Centre, Odessa,  
344 Ukraine), including epoxy granules (< 1.0 mm) with  $1 \text{ g cm}^{-3}$  density, was used for  
345 calibration. The minimally detectable activity ranged from 0.1 until 0.3 Bq per sample  
346 depending on sample mass and radioactivity of the original sample. The small mass of the  
347 muscle samples and the relatively low contamination of frogs from some localities did not  
348 allow to estimate  $^{137}\text{Cs}$  activity concentration above MDA (Supplementary data).

349

#### 350 *Estimation of individual total dose rates*

351 To estimate total individual dose rates (TDR, in  $\mu\text{Gy/h}$ ) absorbed by each frog during the  
352 breeding season, we first estimated whole-body activity of  $^{90}\text{Sr}$  and  $^{137}\text{Cs}$  by integrating  
353 radionuclide activity concentrations (see above) with body mass of each individual, and  
354 considering the relative mass of bones (10%) and muscles (69%, Barnett et al. 2009). We  
355 combined radionuclide activity concentrations in frogs, soil, and water with dose coefficients  
356 (in  $\mu\text{Gy/h}$  per Bq per unit of mass). The use of dose coefficients allows transforming  
357 radionuclide activity (Bq/kg, Bq/L) into dose rate ( $\mu\text{Gy/h}$ ), and are specific for each  
358 radionuclide/organism/ecological scenario combination. Dose coefficients for *H. orientalis*  
359 were calculated for internal and external exposure by taking into consideration a theoretical  
360 ecologically scenario for the species during a whole breeding period as follows: 8h/day spent  
361 on vegetation at >50 cm above ground, 8h/day on the ground, 7h30/day at the water surface,

362 and 30 min/day at the sediment-water interface (soil depth: 10cm; water depth: 100 cm;  
363 grass depth: 10 cm; see Giraudeau et al. 2018, for a similar approach). We calculate doses  
364 using EDEN v3 IRSN software (Beaugelin-Seiller et al. 2006). For each tree frog, total  
365 individual dose rate was calculated by summing internal and external dose rates.

366

### 367 *Statistical analyses*

368 All statistical analyses were conducted in R software (version 3.6.1, R Development Core  
369 Team). We log transformed data of all parameters once we added 0.1 unit to each value of  
370 <sup>90</sup>Sr and <sup>137</sup>Cs dose rates, and to ambient, internal, external, and total dose rate. Using the  
371 whole dataset, we conducted mixed-model regressions (lmer function, package lme4 version  
372 1.1-23) to check for the relationships between ambient and total dose rate. In samples  
373 collected within localities with ambient dose rate > 1 µS/h, we conducted a mixed-model  
374 regression between internal and external dose rate. All regressions included the factor  
375 “locality” as random factor. We also conducted linear models to check for differences  
376 between localities in total dose rate, and internal-to-external ratio. For data plotting and  
377 visualization, we used the function ggplot included in the package ggplot2 (version 3.3.0).

378

### 379 **References**

380 Arkhipov, N.P., Voitsekhovich, O.V., Gladkov, G.N., Dzhepo, S.P., Drapeko, G.F., et al.,  
381 *Bulletin of ecological state of the exclusion zone for the first half-year 1995*. Ministry of  
382 Ukraine for Protection of Public from Consequences of the Accident on Chernobyl NPP.  
383 Chernobyl, Issue 5 (in Russian). (1995).

384 AVMA. *Guidelines for the euthanasia of animals: 2020 Edition*. American Veterinary Medical  
385 Association. Schaumburg, IL. (2020).

386 Barnett, C. L., Belli, M., Beresford, N. A., Bossew, P., Boyer, P. et al. Quantification of  
387 radionuclide transfer in terrestrial and freshwater environments for radiological  
388 assessments. IAEA-TECDOC-1616 (2009).

- 389 Beaugelin-Seiller, K., Jasserand, F., Garnier-Laplace, J. & Gariel, J. C. Modelling  
390 radiological dose in non-human species: principles, computerization, and application.  
391 *Health Phys.* **90**, 485-493 (2006).
- 392 Beresford, N. A. & Coplestone, D. Effects of ionizing radiation on wildlife: What  
393 knowledge have we gained between the Chernobyl and Fukushima accidents? *Integr.*  
394 *Environ. Assess. Manag.* **7**, 371-373 (2011).
- 395 Beresford, N. A., Gaschak, S., Barnett, C. L., Howard, B. J., Chizhevsky, I. et al.  
396 Estimating the exposure of small mammals at three sites within the Chernobyl  
397 exclusion zone – a test application of the ERICA tool. *J. Environ. Radioact.* **99**,  
398 1496–1502 (2008).
- 399 Beresford, N. A., Barnett, C. L., Brown, J. E., Cheng, J.-J., Coplestone, D., et al.  
400 Predicting the radiation exposure of terrestrial wildlife in the Chernobyl exclusion zone:  
401 an international comparison of approaches. *J. Radiol. Prot.* **30**, 341-373 (2010).
- 402 Beresford, N. A., Adam-Guillermin, C., Bonzom, J.-M., Garnier-Laplace, J., Hinton, T. et  
403 al. Comment on “Abundance of birds in Fukushima as judged from Chernobyl” by  
404 Møller et al. (2012). *Environ. Pollut.* **169**, 136 (2012).
- 405 Beresford, N., Horemans, N., Coplestone, D., Raines, K. E., Orizaola, G. et al. Towards  
406 solving a scientific controversy – The effects of ionising radiation on the environment. *J.*  
407 *Environ. Radioact.* **211**, 106033 (2020a).
- 408 Beresford, N. A., Scott, E. M. & Coplestone, D. Field effects studies in the Chernobyl  
409 Exclusion Zone: Lessons to be learnt. *J. Environ. Radioact.* **211**, 105893 (2020b).
- 410 Beresford, N. A., Barnett, C. L., Gashchak, S., Maksimenko, A., Guliaichenko, E., Wood,  
411 M. D. & Izquierdo, M. Radionuclide transfer to wildlife at a ‘Reference Site’ in the  
412 Chernobyl Exclusion Zone and resultant radiation exposures. *J. Environ. Radioact.*  
413 **211**, 105661 (2020c).
- 414 Bondarkov, M. D., Maksimenko, A. M. & Zheltonozhsky, V.A. Non radiochemical  
415 technique for <sup>90</sup>Sr measurement. *Radioprotection* **37**, C1-927-C1-931 (2002).



- 416 Brown, J. E., Alfonso, B., Avila, R., Beresford, N. A., Coplestone, D. et al. The ERICA  
417 tool. *J. Environ. Radioact.* **99**, 1371-1383 (2008).
- 418 Burraco, P., Car, C., Bonzom, J.-M., Beaugelin-Seiller, K., Gaschack, S. & Orizaola, G.  
419 Lack of impact of exposure to radiation on blood physiology biomarkers of Chernobyl  
420 tree frogs. *Front. Zool.* **18**, in press (2021).
- 421 Garnier-Laplace, J., Coplestone, D., Gilbin, R., Alonzo, F., Ciffroy, P. et al. Issues and  
422 practices in the use of effects data from FREDERICA in the ERICA Integrated  
423 Approach. *J. Environ. Radioact.* **99**, 1474-1483 (2008).
- 424 Gashchak, S. P., Beresford, N. A., Maksimenko, A. M. & Vlaschenko, A. S. Strontium-90  
425 and caesium-137 activity concentrations in bats in the Chernobyl exclusion zone.  
426 *Radiat. Environ. Bioph.* **49**, 635-644 (2010).
- 427 Gashchak, S. P., Maklyuk, Y. A., Maksimenko, A. M. & Bondarkov, M. D. Radioecology of  
428 amphibians in Chernobyl zone. *Problems of the Chernobyl Exclusion Zone* **9**, 76-86 (in  
429 Russian) (2009a).
- 430 Gaschak, S., Bondarkov, M., Makluk, J.U., Maksimenko, A., Martynenko, V., et al.  
431 Assessment of radionuclide export from Chernobyl zone via birds 18 years following  
432 the accident. *Radioprotection* **44**, 849-852 (2009b).
- 433 Geras'kin, S. A., Fesenko, S.V. & Alexakhin, R. M. Effects of non-human species  
434 irradiation after the Chernobyl NPP accident. *Environ. Int.* **34**, 880–897 (2008).
- 435 Giraudeau, M., Bonzom, J.-M., Ducatez, S., Beaugelin-Seiller, K., Deviche, P., et al.  
436 Carotenoid distribution in wild Japanese tree frogs (*Hyla japonica*) exposed to ionizing  
437 radiation in Fukushima. *Sci. Rep.* **8**, 7438. (2018).
- 438 ICRP. Environmental protection: the concept and use of reference animals and plants.  
439 *Annals of the ICRP* **38**, 1-242 (2008).
- 440 Intelligence Systems GEO. *Atlas of radioactive contamination of Ukraine*. Ministry of  
441 Emergencies and Affairs of Population Protection from the Consequences of  
442 Chernobyl Catastrophe, Ukraine (2011).

- 443 Leadon S. A. Repair of DNA damage produced by ionizing radiation: a minireview. *Semin.*  
444 *Radiat. Oncol.* **6**, 295-305 (1996).
- 445 Maklyuk, Y. A., Maksimenko, A. M., Gaschak, S. P., Bondarkov, M. D. & Chizhevsky, I. V.  
446 Long-term dynamic of radioactive contamination ( $^{90}\text{Sr}$ ,  $^{137}\text{Cs}$ ) of small mammals in  
447 Chernobyl zone. *Ecology* **38**, 198-206 (in Russian) (2007).
- 448 Møller, A. P. & Mousseau, T. A. Biological consequences of Chernobyl: 20 years on. *Trends*  
449 *Ecol. Evol.* **21**, 200-207 (2006).
- 450 Møller, A. P. & Mousseau, T. A. Are organisms adapting to ionizing radiation at Chernobyl?  
451 *Trends Ecol Evol.* **31**, 281-289 (2016).
- 452 Özdemir, N., Altunışık, A., Ergül, T., Gül, S., Tosunoğlu, M. et al. Variation in body size  
453 and age structure among three Turkish populations of the treefrog *Hyla arborea*.  
454 *Amphibia-Reptilia* **33**, 25-35 (2012).
- 455 Raines, K. E., Whitehorn, P. R., Copplestone, D. & Tinsley, M. C. Chernobyl-level  
456 radiation exposure damages bumblebee reproduction: a laboratory experiment. *Proc.*  
457 *R. Soc. B.* **287**, 20201638 (2020).
- 458 Santivasi, W. L. & Xia, F. Ionizing radiation-induced DNA damage, response, and repair.  
459 *Antioxid. Redox Signal.* **21**, 251-259 (2014).
- 460 Sahoo, S. K., Kavasi, N., Sorimachi, A., Arae, H., Tokonami, S. et al. Strontium-90 activity  
461 concentration in soil samples from the exclusion zone of the Fukushima daiichi nuclear  
462 power plant. *Sci. Rep.* **6**, 23925 (2016).
- 463 Sohrabi M. World high background natural radiation areas: Need to protect public from  
464 radiation exposure. *Radiat. Meas.* **50**, 166-171 (2013).
- 465 Stark, K., Avila, R. & Wallberg, P. Estimation of radiation doses from  $^{137}\text{Cs}$  to frogs in a  
466 wetland ecosystem. *J. Environ. Radioact.* **75**, 1-14 (2004).
- 467 Stöck, M., Dufresnes, C., Litvinchuk, S. N., Lymberakis, P., Biollay, S. et al. Cryptic  
468 diversity among Western Palearctic tree frogs: Postglacial range expansion, range

469 limits, and secondary contacts of three European tree frog lineages (*Hyla arborea*  
470 group). *Mol. Phylogenet. Evol.* **65**, 1-9 (2012).

471

## 472 **Acknowledgments**

473 We thank Sergey Gaschack and Yevgenii Gulyaichenko for his invaluable help in the field  
474 and on activity rate estimations, and the administrative personal of the Chornobyl Center for  
475 Nuclear Safety, Radioactive Waste and Radioecology (Ukraine) for help with research  
476 permits and transportation. Clare Bradshaw helped us during the initial stages of the study,  
477 and Karine Beaugelin-Seiller during dose rate calculations. This work was supported by the  
478 Swedish Radiation Protection Agency-SSM (SSM2018-2038), the FP7-EURATOM  
479 COordination and iMplementation of a pan-European instrument for radioecology-COMET  
480 project (EU- 604974), and by Carl Tryggers Foundation (CT 16:344). Carl Tryggers  
481 Foundation scholarship (CT 16:344) and Marie Sklodowska-Curie fellowship (METAGE-  
482 797879) supported PB, an IRSN doctoral fellowship supported CC, the Institute for  
483 Radioecological Protection and Nuclear Safety (IRSN) supported JMB, and the Spanish  
484 Ministry of Science, Innovation and Universities (Ramón y Cajal program, RYC-2016-20656)  
485 supported GO.

486

## 487 **Author's Contributions**

488 GO conceived and designed the study; PB, JMB, and GO carried out the field work; CC and  
489 JMB performed dose rate calculations; PB analysed the data; PB and GO wrote the paper  
490 with inputs from CC and JMB.

491

## 492 **Competing interests**

493 The authors declare no competing interests

494 **Figure 1.** Map showing the localities where males of Eastern tree frog (*Hyla orientalis*) were  
495 sampled. The abbreviations refer to the locality name. Vershina (VE), Azbuchin (AZ),  
496 Muravka (MU), Glyboke Hydro (GH), Northern Trace (NT), Dolzhikovo (DO), Lubianka (LU),  
497 Novosiolki (NO), Zalesie (ZA), Yampol (YA), Glinka (GL), and Razjezzheie (RA; see Table 1  
498 for details). The underlying  $^{137}\text{Cs}$  soil data (decay corrected to spring 2018) is derived  
499 from the Atlas of Radioactive Contamination of Ukraine (Intelligence Systems GEO, 2011).

500

501 **Figure 2.** Total dose rates ( $\mu\text{Gy}/\text{h}$ ) of male breeding Eastern tree frogs (*Hyla orientalis*) living  
502 within Chernobyl Exclusion Zone. ICRP's  $40 \mu\text{Gy}/\text{h}$  level for detecting damage on the  
503 reference frog, and ERICA's  $10 \mu\text{Gy}/\text{h}$  screening level for protecting organisms within  
504 ecosystems are depicted with dotted lines. See Fig.1 for correspondence of locality.

505

506 **Figure 3.** Contribution of internal dose rates (in percentage) to total individual dose rates of  
507 breeding Eastern tree frog (*Hyla orientalis*) males collected within the Chernobyl Exclusion  
508 Zone (only in individuals from localities with ambient dose rate  $> 1 \mu\text{Sv}/\text{h}$ ). See Fig.1 for  
509 correspondence of locality.

510

511 **Figure 4.** Correlation between ambient dose rates (in  $\mu\text{Sv}/\text{h}$ ) and total dose rates (in  $\mu\text{Gy}/\text{h}$ )  
512 in breeding Eastern tree frog (*Hyla orientalis*) males living in the Chernobyl Exclusion Zone.

513

514 **Figure 5.** Contribution of  $^{90}\text{Sr}$  and  $^{137}\text{CS}$  (in percentage), to total dose rate in breeding  
515 Eastern tree frog (*Hyla orientalis*) males living in the Chernobyl Exclusion Zone (in individuals  
516 from localities with ambient dose rate  $> 1 \mu\text{Sv}/\text{h}$ ). Bars represent the locality average  
517 contribution for both isotopes, and points the contributions of each individual/isotope  
518 combination. See Fig.1 for correspondence of locality.

**Table 1.** Geographic coordinates (latitude and longitude), and current levels of environmental radiation (i.e. ambient dose rate) of the Eastern tree frog (*Hyla orientalis*) breeding localities included in the study. (\* 7.61  $\mu\text{Sv/h}$  in 2017 and 2018; \*\* 1.09  $\mu\text{Sv/h}$  in 2017, 1.50  $\mu\text{Sv/h}$  in 2018, differences due to small changes in sampling areas within each locality and year).

| Locality       | Code | GPS coordinates  | Ambient dose rate ( $\mu\text{Sv/h}$ ) |
|----------------|------|------------------|----------------------------------------|
| Vershina       | VE   | 51.4328, 30.0769 | 16.20                                  |
| Azbuchin       | AZ   | 51.4047, 30.1044 | 32.40 *                                |
| Muravka        | MU   | 51.4515, 30.0528 | 3.70                                   |
| Glyboke Hydro  | GH   | 51.4447, 30.0711 | 3.70                                   |
| Northern Trace | NT   | 51.4567, 30.0486 | 2.51                                   |
| Dolzhikovo     | DO   | 51.4256, 30.1161 | 2.10 **                                |
| Lubianka       | LU   | 51.3388, 29.7976 | 0.27                                   |
| Novosiolki     | NO   | 51.2195, 30.0430 | 0.13                                   |
| Zalesie        | ZA   | 51.2506, 30.1667 | 0.12                                   |
| Yampol         | YA   | 51.2119, 30.1899 | 0.10                                   |
| Glinka         | GL   | 51.2300, 29.9250 | 0.10                                   |
| Razjezheie     | RA   | 51.2786, 29.9050 | 0.07                                   |

**Table 2.** Dose rates of breeding Eastern tree frog (*Hyla orientalis*) males captured within the Chernobyl Exclusion Zone (2016-2018). Data presented as mean value (range). Only localities sampled more than one year had variation in external dose rates. MDA: minimal detectable activity.

| Locality       | Code | Sampled frogs (n) | Internal Dose Rate ( $\mu\text{Gy/h}$ ) | External Dose Rate ( $\mu\text{Gy/h}$ ) | Total Dose Rate ( $\mu\text{Gy/h}$ ) |
|----------------|------|-------------------|-----------------------------------------|-----------------------------------------|--------------------------------------|
| Vershina       | VE   | 13                | 19.45 (34.77-7.65)                      | 1.51                                    | 20.96 (36.28-9.16)                   |
| Azbuchin       | AZ   | 46                | 13.31 (37.49-1.47)                      | 1.82 (2.00-1.69)                        | 15.13 (39.35-3-16)                   |
| Muravka        | MU   | 12                | 4.89 (7.72-2.92)                        | 0.58                                    | 4.81 (8.29-3.50)                     |
| Glyboke Hydro  | GH   | 10                | 4.72 (13.25-0.51)                       | 0.69                                    | 5.41 (13.94-1.19)                    |
| Northern Trace | NT   | 18                | 2.46 (4.74-1.16)                        | 0.46                                    | 2.93 (5.20-1.63)                     |
| Dolzhikovo     | DO   | 49                | 2.25 (5.48-0)                           | 0.33 (0.34-0.33)                        | 2.58 (5.82-0.33)                     |
| Lubianka       | LU   | 5                 | 0.09 (0.14-0.05)                        | 0.03                                    | 0.11 (0.17-0.10)                     |
| Novosiolki     | NO   | 12                | 0 (0.02-MDA)                            | MDA                                     | 0.01 (0.02-MDA)                      |
| Zalesie        | ZA   | 12                | 0.02 (0.04-MDA)                         | 0.01                                    | 0.03 (0.05-0.02)                     |
| Yampol         | YA   | 14                | 0 (0.01-MDA)                            | 0.01                                    | 0.01 (0.02-0.01)                     |
| Glinka         | GL   | 25                | 0.01 (0.05-MDA)                         | MDA                                     | 0.01 (0.05-MDA)                      |
| Razjezheie     | RA   | 10                | 0.11 (0.90-MDA)                         | MDA                                     | 0.11 (0.91-MDA)                      |

# Figure 1

bioRxiv preprint doi: <https://doi.org/10.1101/2021.05.17.443382>; this version posted May 17, 2021. The copyright holder for this preprint (which was not certified by peer review) is the author/funder, who has granted bioRxiv a license to display the preprint in perpetuity. It is made available under a [CC-BY-NC-ND 4.0 International license](https://creativecommons.org/licenses/by-nc-nd/4.0/).

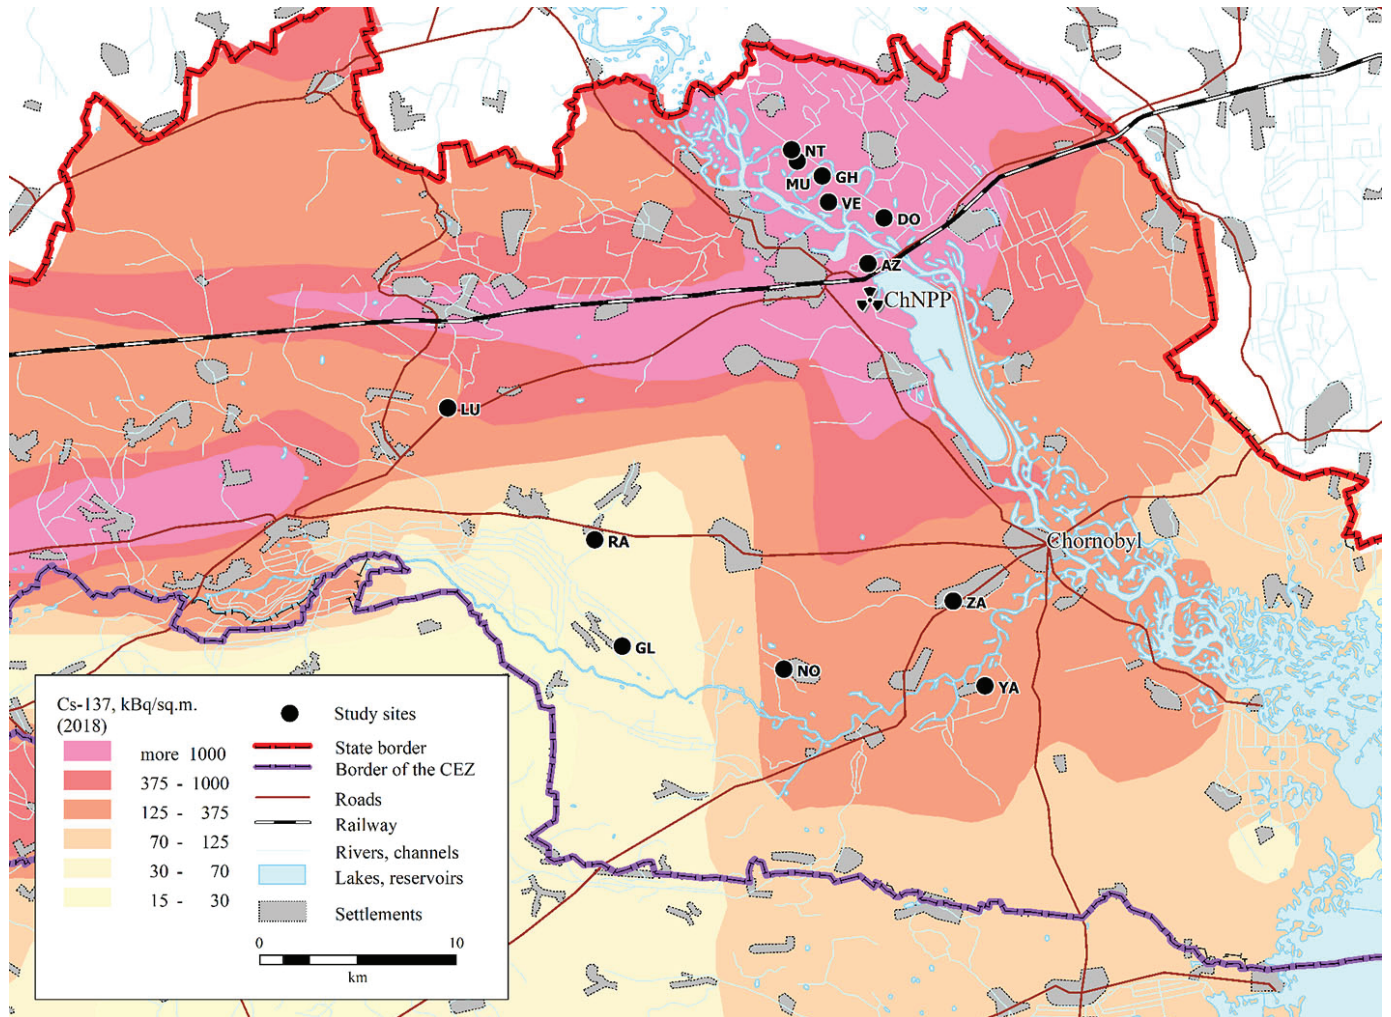

# Figure 2

bioRxiv preprint doi: <https://doi.org/10.1101/2021.05.17.443382>; this version posted May 17, 2021. The copyright holder for this preprint (which was not certified by peer review) is the author/funder, who has granted bioRxiv a license to display the preprint in perpetuity. It is made available under a [CC-BY-NC-ND 4.0 International license](https://creativecommons.org/licenses/by-nc-nd/4.0/).

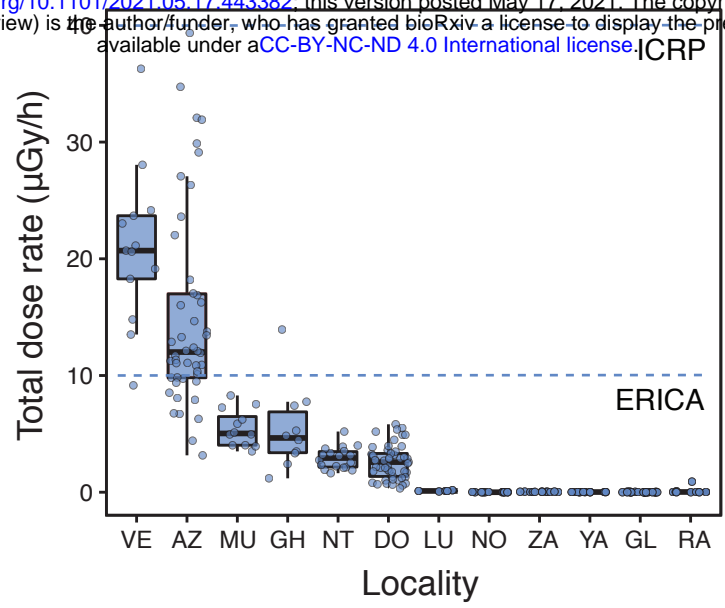



# Figure 3

bioRxiv preprint doi: <https://doi.org/10.1101/2021.05.17.443382>; this version posted May 17, 2021. The copyright holder for this preprint (which was not certified by peer review) is the author/funder, who has granted bioRxiv a license to display the preprint in perpetuity. It is made available under aCC-BY-NC-ND 4.0 International license.

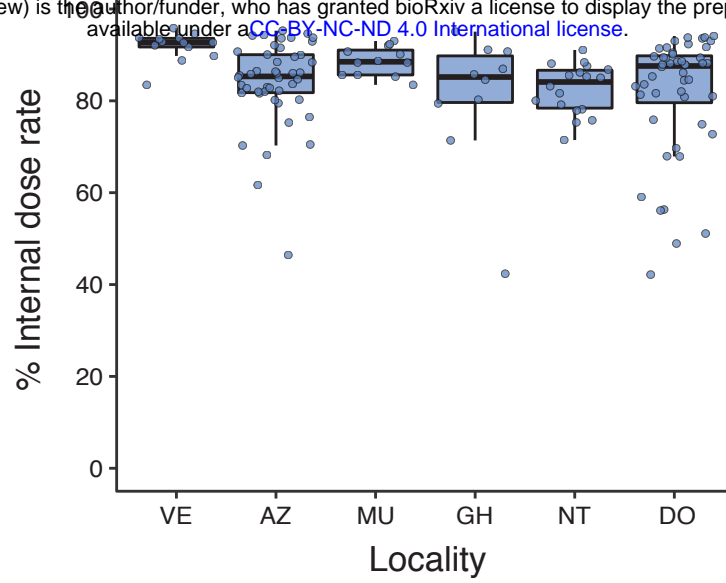

# Figure 4

bioRxiv preprint doi: <https://doi.org/10.1101/2021.05.17.443382>; this version posted May 17, 2021. The copyright holder for this preprint (which was not certified by peer review) is the author/funder, who has granted bioRxiv a license to display the preprint in perpetuity. It is made available under a [CC-BY-NC-ND 4.0 International license](#).

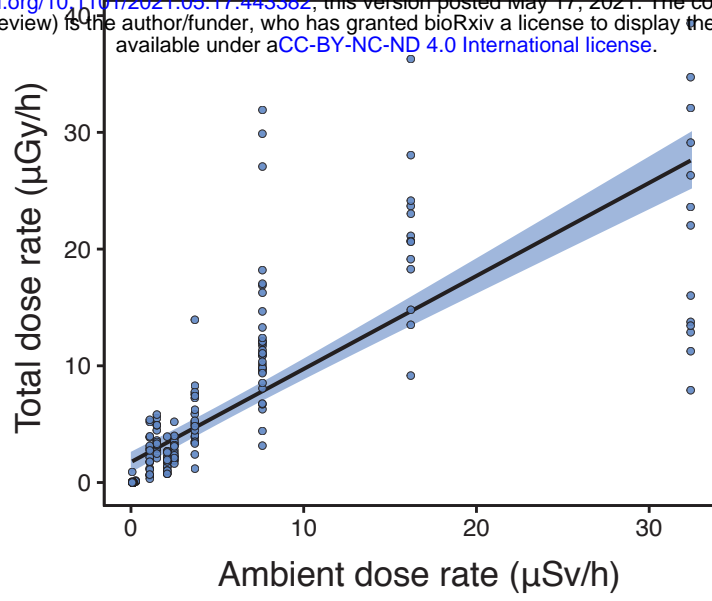

# Figure 5

bioRxiv preprint doi: <https://doi.org/10.1101/2021.05.17.443382>; this version posted May 17, 2021. The copyright holder for this preprint (which was not certified by peer review) is the author/funder, who has granted bioRxiv a license to display the preprint in perpetuity. It is made available under aCC-BY-NC-ND 4.0 International license.

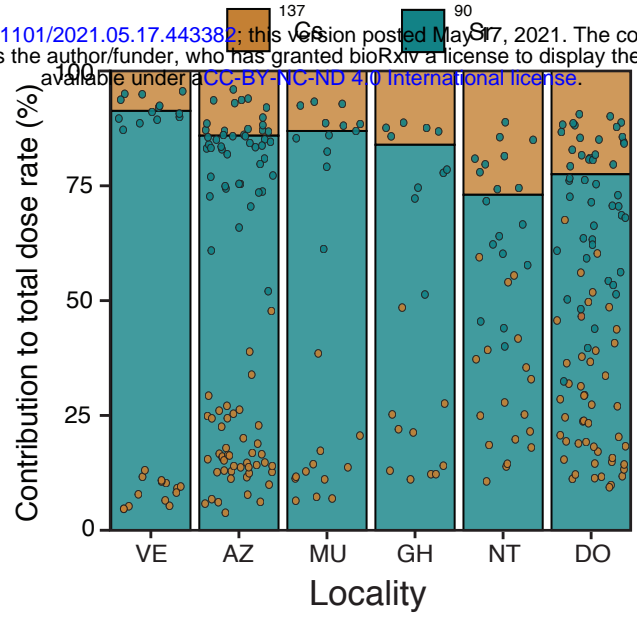

Source: https://www.biorxiv.org/content/10.1101/2021.05.17.443382v1.full.pdf
